# Supplementary material for: Exome-Based Genomic Markers Could Improve Prediction of Checkpoint Inhibitor Efficacy Independently of Tumor Type
Source: MDPI journal article supplement (doi:10.3390/ijms24087592), 2023-04-20
Supplement: s1 [file s1]

**Supplementary Table S1:** Clinical characteristics for the whole cohort according to RECIST criteria.

| Variables          | Progression<br>N=115 | Response<br>N=32 | P-value | Adjusted<br>P-value |
|--------------------|----------------------|------------------|---------|---------------------|
| Gender             |                      |                  | 0.7     | 0.7                 |
| Male               | 60 (52%)             | 18 (56%)         |         |                     |
| Female             | 55 (48%)             | 14 (44%)         |         |                     |
| Age                | 61 (56, 67)          | 66 (58, 71)      | 0.2     | 0.5                 |
| ≤60                | 50 (43%)             | 11 (34%)         | 0.4     | 0.6                 |
| >60                | 65 (57%)             | 21 (66%)         |         |                     |
| NA                 | 1                    | 0                |         |                     |
| Stage at diagnosis |                      |                  | 0.4     | 0.6                 |
| Local              | 53 (46%)             | 12 (38%)         |         |                     |
| Metastatic         | 62 (54%)             | 20 (62%)         |         |                     |
| PDL1 status        |                      |                  | 0.11    | 0.3                 |
| Positive           | 16 (37%)             | 2 (12%)          |         |                     |
| Negative           | 27 (63%)             | 14 (88%)         |         |                     |
| NA                 | 72                   | 16               |         |                     |
| Surgery            |                      |                  | 0.6     | 0.7                 |
| Yes                | 66 (57%)             | 20 (62%)         |         |                     |
| No                 | 49 (43%)             | 12 (38%)         |         |                     |
| Type of surgery    |                      |                  | 0.6     | 0.7                 |
| Curative           | 44 (90%)             | 10 (83%)         |         |                     |
| Palliative         | 5 (10%)              | 2 (17%)          |         |                     |
| Histology          |                      |                  | 0.3     | 0.5                 |
| Adenocarcinoma     | 60 (52%)             | 19 (59%)         |         |                     |
| Carcinoma          | 44 (38%)             | 8 (25%)          |         |                     |
| Other              | 11 (9.6%)            | 5 (16%)          |         |                     |
| Line of ICI        |                      |                  | <0.001  | 0.02                |
| ≤2                 | 68 (59%)             | 29 (91%)         |         |                     |
| >2                 | 47 (41%)             | 3 (9.4%)         |         |                     |
| Number of cycles   |                      |                  | 0.8     | 0.9                 |
| ≤2                 | 41 (36%)             | 12 (38%)         |         |                     |
| >2                 | 74 (64%)             | 20 (62%)         |         |                     |
| Type of ICI        |                      |                  | 0.5     | 0.6                 |
| PD-1               | 72 (63%)             | 18 (56%)         |         |                     |
| PD-L1              | 19 (17%)             | 4 (12%)          |         |                     |
| PD-1/CTLA-4        | 2 (1.7%)             | 2 (6.2%)         |         |                     |
| PD-L1/CTLA-4       | 19 (17%)             | 7 (22%)          |         |                     |
| Other              | 3 (2.6%)             | 1 (3.1%)         |         |                     |
| WHO status at ICI  |                      |                  | 0.11    | 0.3                 |
| 0                  | 36 (32%)             | 15 (47%)         |         |                     |
| >0                 | 78 (68%)             | 17 (53%)         |         |                     |
| NA                 | 1                    | 0                |         |                     |
| Smoking status     |                      |                  | 0.2     | 0.5                 |
| Never              | 28 (31%)             | 5 (19%)          |         |                     |
| Smoker             | 63 (69%)             | 22 (81%)         |         |                     |

|                              |        |               |               |       |      |
|------------------------------|--------|---------------|---------------|-------|------|
|                              | NA     | 24            | 5             |       |      |
| Cerebral metastasis          | NA     | 20 (18%)<br>1 | 4 (12%)<br>0  | 0.5   | 0.6  |
| Liver metastasis             | NA     | 34 (30%)<br>1 | 13 (41%)<br>0 | 0.2   | 0.5  |
| Bone metastasis              | NA     | 39 (34%)<br>1 | 8 (25%)<br>0  | 0.3   | 0.5  |
| Lymph node metastasis        | NA     | 75 (66%)<br>2 | 27 (84%)<br>0 | 0.049 | 0.3  |
| Lung metastasis              | NA     | 49 (46%)<br>9 | 9 (29%)<br>1  | 0.088 | 0.3  |
| Pleuro-peritoneal metastasis | NA     | 47 (41%)<br>1 | 8 (25%)<br>0  | 0.094 | 0.3  |
| Toxicity                     |        | 40 (35%)      | 21 (66%)      | 0.002 | 0.02 |
| Use of corticosteroids       |        | 35 (30%)      | 14 (44%)      | 0.2   | 0.4  |
| Cancer                       |        |               |               | 0.089 | 0.3  |
|                              | Breast | 8 (7.0%)      | 3 (9.4%)      |       |      |
|                              | Colon  | 10 (8.7%)     | 8 (25%)       |       |      |
|                              | Lung   | 45 (39%)      | 10 (31%)      |       |      |
|                              | Other  | 52 (45%)      | 11 (34%)      |       |      |

Continuous variables were described by median values and interquartile range (IQR). Categorical variables were described by number of observation and percentages (%).

NA: Not Available; ICI: Immune Checkpoint Inhibitor; PD-1: Programmed cell Death protein 1; PD-L1: Programmed Death-Ligand 1; CTLA-4: Cytotoxic T Lymphocyte-Associated protein 4; WHO: World Health Organization.

**Supplementary Table S2:** Exome-derived variables in the whole cohort by Recist criteria

| Variables           | Progresssion<br>N = 115 | Response<br>N=32  | P-value | Adjusted<br>P-value |
|---------------------|-------------------------|-------------------|---------|---------------------|
| TMB status          |                         |                   | 0.028   | 0.3                 |
| Low                 | 105 (91%)               | 24 (75%)          |         |                     |
| High                | 10 (8.7%)               | 8 (25%)           |         |                     |
| TMB score           | 4.3 (2.7, 6.6)          | 4.7 (3.3, 9.2)    | 0.2     | 0.3                 |
| MSI status          |                         |                   | 0.2     | 0.3                 |
| MSS                 | 111 (97%)               | 29 (91%)          |         |                     |
| MSI                 | 4 (3.5%)                | 3 (9.4%)          |         |                     |
| MSI score           | 1.3 (0.9, 1.8)          | 1.3 (1.1, 2.0)    | 0.3     | 0.5                 |
| TCR clonality       | 7 (4, 12)               | 6 (3, 13)         | 0.7     | 0.7                 |
| BCR clonality       | 0.00 (0.00, 2.00)       | 1.00 (0.00, 2.25) | 0.2     | 0.3                 |
| NA                  | 2                       | 0                 |         |                     |
| Neopeptides         | 11 (7, 26)              | 20 (8, 47)        | 0.12    | 0.3                 |
| NA                  | 3                       | 0                 |         |                     |
| Strong neopeptides  | 2.0 (0.0, 5.0)          | 2.5 (1.0, 5.2)    | 0.11    | 0.3                 |
| NA                  | 3                       | 0                 |         |                     |
| CNV signature 1     | 68 (52, 80)             | 65 (50, 76)       | 0.7     | 0.7                 |
| NA                  | 2                       | 0                 |         |                     |
| CNV signature 2     | 0.00 (0.00, 0.00)       | 0.00 (0.00, 0.00) | 0.2     | 0.4                 |
| NA                  | 2                       | 0                 |         |                     |
| CNV signature 3     | 13 (10, 20)             | 13 (10, 19)       | 0.6     | 0.7                 |
| NA                  | 2                       | 0                 |         |                     |
| CNV signature 4     | 0.00 (0.00, 1.23)       | 0.00 (0.00, 0.00) | 0.017   | 0.3                 |
| NA                  | 2                       | 0                 |         |                     |
| CNV signature 5     | 10 (5, 17)              | 16 (6, 25)        | 0.090   | 0.3                 |
| NA                  | 2                       | 0                 |         |                     |
| CNV signature 6     | 0.00 (0.00, 0.00)       | 0.00 (0.00, 0.00) | 0.12    | 0.3                 |
| NA                  | 2                       | 0                 |         |                     |
| CNV signature 7     | 0 (0, 8)                | 0 (0, 12)         | 0.6     | 0.7                 |
| NA                  | 3                       | 0                 |         |                     |
| TCR Pielou's score  | 0.98 (0.96, 1.00)       | 0.99 (0.96, 1.00) | 0.7     | 0.7                 |
| NA                  | 8                       | 2                 |         |                     |
| BCR Pielou's score  | 1.00 (0.89, 1.00)       | 0.96 (0.00, 1.00) | 0.2     | 0.3                 |
| NA                  | 67                      | 12                |         |                     |
| TCR Shannon entropy | 2.85 (2.14, 3.53)       | 2.70 (1.65, 3.63) | 0.7     | 0.7                 |
| NA                  | 8                       | 2                 |         |                     |
| BCR Shannon entropy | 1.58 (1.00, 2.27)       | 1.00 (0.00, 1.92) | 0.13    | 0.3                 |
| NA                  | 67                      | 12                |         |                     |
| KRAS                |                         |                   | 0.12    | 0.3                 |
| WT                  | 99 (86%)                | 31 (97%)          |         |                     |
| Mutated             | 16 (14%)                | 1 (3.1%)          |         |                     |
| STK11               |                         |                   | >0.9    | >0.9                |
| WT                  | 108 (94%)               | 31 (97%)          |         |                     |
| Mutated             | 7 (6.1%)                | 1 (3.1%)          |         |                     |

|       |                  |           |          |      |     |
|-------|------------------|-----------|----------|------|-----|
| APC   | WT               | 111 (97%) | 30 (94%) | 0.6  | 0.7 |
|       | Mutated          | 4 (3.5%)  | 2 (6.2%) |      |     |
| RNF43 | WT               | 112 (97%) | 29 (91%) | 0.12 | 0.3 |
|       | Mutated          | 3 (2.6%)  | 3 (9.4%) |      |     |
| CD274 | Amplification    | 8 (7.0%)  | 1 (3.1%) | 0.7  | 0.7 |
|       | No amplification | 107 (93%) | 31 (97%) |      |     |

Continuous variables were described by median values and interquartile range (IQR). Categorical variables were described by number of observation and percentages (%).

TMB: Tumor Mutational Burden; MSI: Microsatellite Instability; MSS: Microsatellite Stable; TCR: T-Cell Receptor; BCR: B-Cell Receptor; CNV: Copy Number Variant, WT: Wild-Type
