# Supplementary material for: Exome-Based Genomic Markers Could Improve Prediction of Checkpoint Inhibitor Efficacy Independently of Tumor Type
Source: MDPI journal article supplement (doi:10.3390/ijms24087592), 2023-04-20
Supplement: s1 [file s1]

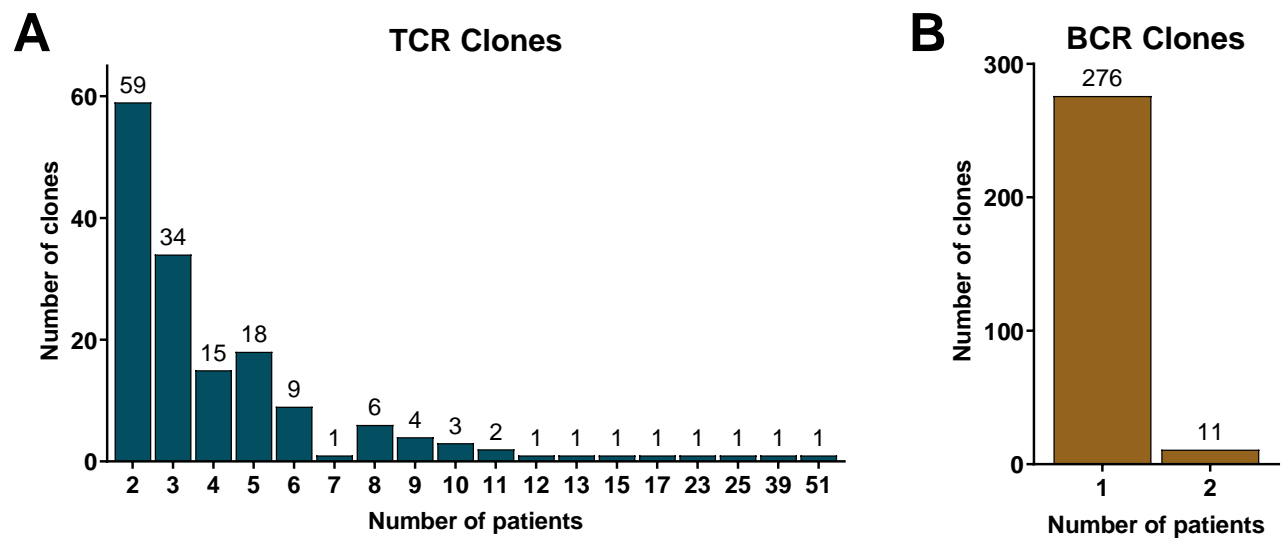

**Supplementary Figure S1:** Description of TCR and BCR clonality

Barplots representing the number of clones shared by increasing numbers of patients for A) TCR clones and B) BCR clones.
